# Supplementary material
Source: PubMed Central journal article supplement (PMC6199652)
Supplement: ba021436-suppl1.pdf [file ba021436-suppl1.pdf]

**Appendix: Diagnosis and procedure codes used to assess therapeutic phlebotomy, hydroxyurea and thrombosis**

|                                   |                                                                               |                                        |                                                                                                                                                                                                                                                                                                                                                                                                                                                                                                                                                          |
|-----------------------------------|-------------------------------------------------------------------------------|----------------------------------------|----------------------------------------------------------------------------------------------------------------------------------------------------------------------------------------------------------------------------------------------------------------------------------------------------------------------------------------------------------------------------------------------------------------------------------------------------------------------------------------------------------------------------------------------------------|
| Phlebotomy                        |                                                                               | HCPCS                                  | 99195                                                                                                                                                                                                                                                                                                                                                                                                                                                                                                                                                    |
| Hydroxyurea                       |                                                                               | Medicare Part D claims<br>PROD_SRVC_ID | '60429026501' '49884072401' '00555088202'<br>'54868477300' '54868477301' '54868477302'<br>'54868477303' '54868477304' '68084028401'<br>'68084028411' '42291032101' '00003083050'<br>'00003633517' '00003633617' '00003633717'<br>'00054224725' '00054824725' '00440761330'<br>'00603394621' '00677168001' '00904539460'<br>'54569571500' '51285054802' '51552085104'<br>'51552085109' '51927265500' '54569037800'<br>'54569037801' '54569037802' '54569571500'<br>'54738054701' '54868136700' '57866443601'<br>'58063097909' '58406050101' '68258904001' |
| Thrombosis events after diagnosis | Pulmonary Embolism (PE) / Deep Vein Thrombosis (DVT) / Arterial Embolism (AE) | ICD-9 diagnosis                        | 415.1x, 451.1x, 451.81, 451.83, 451.89, 452.x, 453.0, 453.2, 453.3, 453.4x, 453.5x, 453.7, 453.72, 453.73, 453.74, 453.75, 453.76, 453.77, 453.79, 453.8, 453.82, 453.83, 453.84, 453.85, 453.86, 453.87, 453.89, 453.9, 444.x, 593.81                                                                                                                                                                                                                                                                                                                   |
|                                   | Acute Myocardial Infarction (AMI) / Acute Coronary Syndrome (ACS) / Angina    | ICD-9 diagnosis                        | 410.x1, 411.1, 411.8, 411.81, 411.89, 413.x                                                                                                                                                                                                                                                                                                                                                                                                                                                                                                              |
|                                   | Stroke/ Transient Ischemic Attack (TIA)                                       | ICD-9 diagnosis                        | 433.x, 434.x, 435.x                                                                                                                                                                                                                                                                                                                                                                                                                                                                                                                                      |
|                                   | Sudden Death                                                                  | ICD-9 diagnosis                        | 798.1x, 798.2x, 798.9x                                                                                                                                                                                                                                                                                                                                                                                                                                                                                                                                   |
|                                   | Peripheral arterial thrombosis                                                | ICD-9 diagnosis                        | 443.8x, 443.9x                                                                                                                                                                                                                                                                                                                                                                                                                                                                                                                                           |
|                                   | Superficial thrombophlebitis                                                  | ICD-9 diagnosis                        | 453.6x, 453.71, 453.81                                                                                                                                                                                                                                                                                                                                                                                                                                                                                                                                   |
